# Supplementary material for: Thickness-dependent excitonic properties of WSe2/FePS3 van der Waals heterostructures
Source: Royal Society of Chemistry journal article supplement (doi:10.1039/d2nr05455h), 2022-11-29
Supplement: d2nr05455h1.pdf [file d2nr05455h1.pdf]

## Thickness-Dependent Excitonic Properties of WSe<sub>2</sub>/FePS<sub>3</sub> van der Waals Heterostructures

Xu Zhang<sup>a, #</sup>, Chunli Wang<sup>a, #</sup>, Zhenwei Ou<sup>b, #</sup>, Xiaohong Jiang<sup>c, d, #</sup>, Jinlian Chen<sup>a</sup>, Huifang Ma<sup>a</sup>, Chenyang Zha<sup>a</sup>, Wei Wang<sup>a</sup>, Linghai Zhang<sup>a, \*</sup>, Ti Wang<sup>b, \*</sup>, Lin Wang<sup>a, \*</sup>

<sup>a</sup> School of Flexible Electronics (Future Technologies) & Institute of Advanced Materials (IAM), Key Laboratory of Flexible Electronics (KLOFE), Jiangsu National Synergetic Innovation Center for Advanced Materials (SICAM), Nanjing Tech University (NanjingTech), Nanjing 211816, China

<sup>b</sup> School of Physics and Technology, and Key Laboratory of Artificial Micro- and Nano-structures of Ministry of Education Wuhan University Wuhan 430072, China

<sup>c</sup> MIIT Key Laboratory of Flexible Electronics (KLOFE), Shanxi Key Laboratory of Flexible Electronics (KLOFE), Xi'an Key Laboratory of Flexible Electronics (KLOFE), Xi'an Key Laboratory of Biomedical Materials & Engineering, Xi'an Institute of Flexible Electronics, Institute of Flexible Electronics (IFE), Northwestern Polytechnical University, Xi'an 710072, Shaanxi, China

<sup>d</sup> Shaanxi Provincial Key Laboratory of Papermaking Technology and Specialty Paper Development, College of Bioresource Chemical and Materials Engineering, Shaanxi University of Science & Technology, Xi'an 710021, P. R. China

# These authors contributed equally to this work.

\* Corresponding author.

E-mail: [iam.lzhang@njtech.edu.cn](mailto:iam.lzhang@njtech.edu.cn)

E-mail: [wangti@whu.edu.cn](mailto:wangti@whu.edu.cn)

E-mail: [iamlwang@njtech.edu.cn](mailto:iamlwang@njtech.edu.cn)

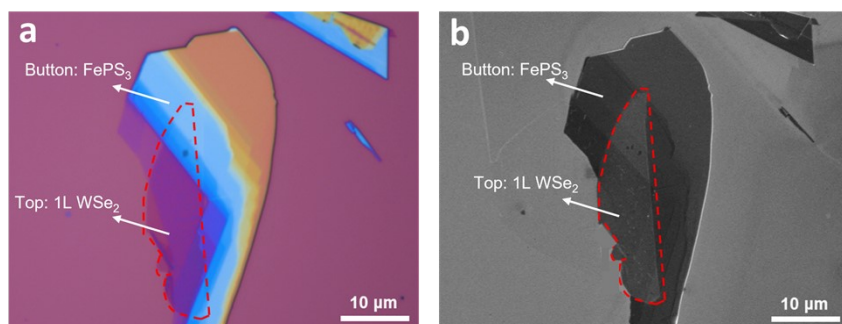

**Figure S1** (a, b) The optical microscopy (OM) image and the corresponding scanning electron microscope (SEM) image of  $\text{WSe}_2/\text{FePS}_3$  van der Waals heterostructures, respectively.

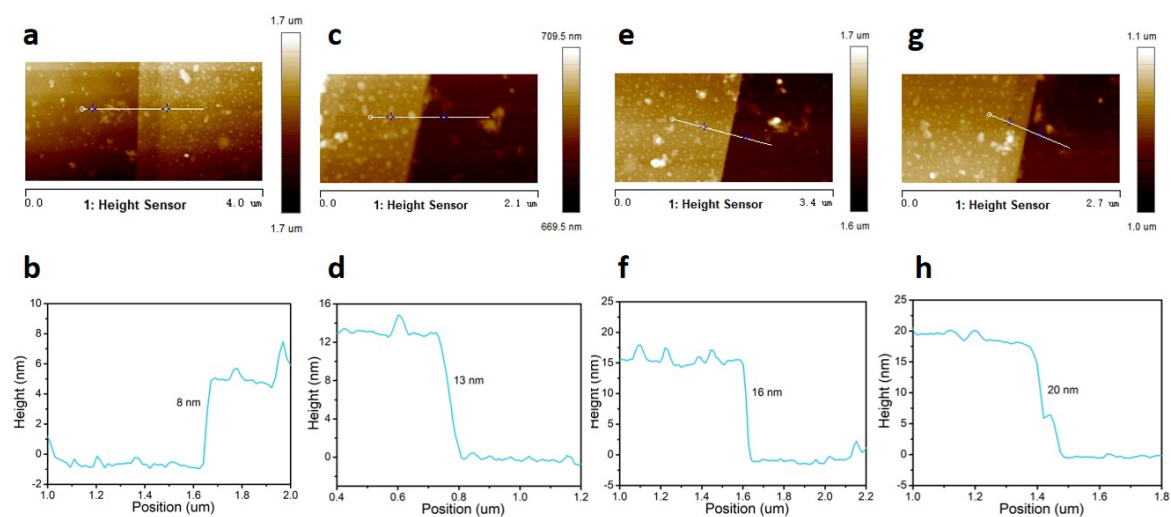

**Figure S2.** The atomic force microscope measurements of  $\text{WSe}_2/\text{FePS}_3$  van der Waals heterostructures.

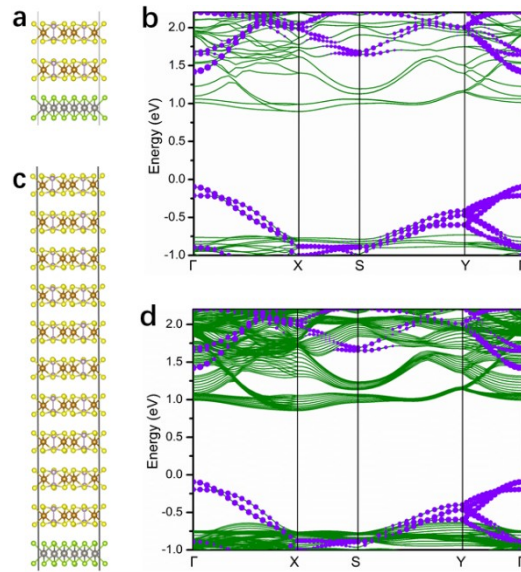

**Figure S3.** The relaxed structures of the monolayer-WSe<sub>2</sub>/2L-FePS<sub>3</sub> (a) and monolayer-WSe<sub>2</sub>/10L-FePS<sub>3</sub> (c) heterostructures. The band structures of the monolayer-WSe<sub>2</sub>/2L-FePS<sub>3</sub> (b) and monolayer-WSe<sub>2</sub>/10L-FePS<sub>3</sub> (d) heterostructures. The green lines are the energy bands of multilayered FePS<sub>3</sub> and the green lines with purple dots are the energy bands of monolayer-WSe<sub>2</sub>.

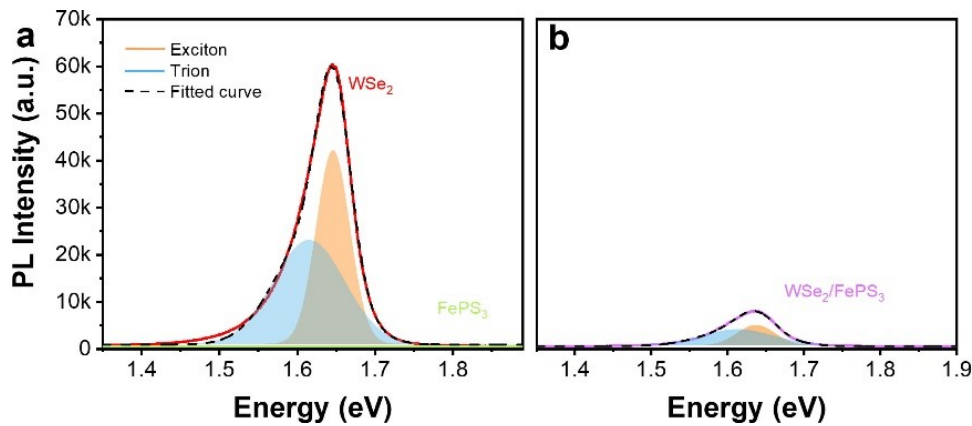

**Figure S4.** The PL spectra of isolated WSe<sub>2</sub> monolayer and isolated FePS<sub>3</sub> (a) as well as WSe<sub>2</sub>/FePS<sub>3</sub> heterostructure (b) with fitted curves under the excitation of 532 nm at room temperature.

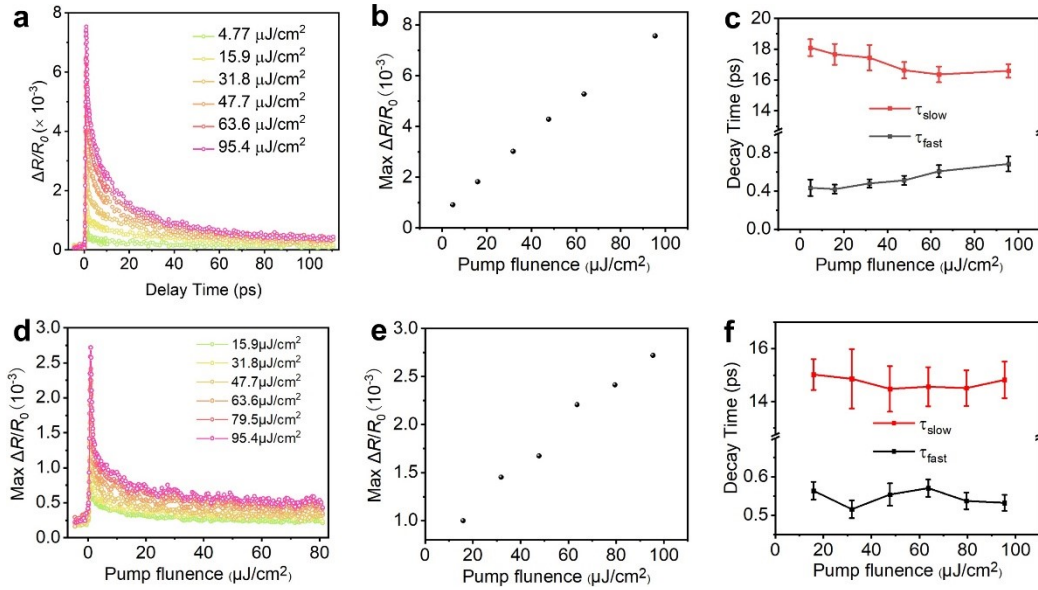

**Figure S5. Photocarrier dynamics in individual monolayer WSe<sub>2</sub> and WSe<sub>2</sub>/nL-FePS<sub>3</sub> heterostructures.** (a, d) Differential reflection signals of WSe<sub>2</sub> monolayer and WSe<sub>2</sub>/nL-FePS<sub>3</sub> heterostructures as a function of the probe delay measured with a 400 nm pump and a 743 nm probe under various excitation fluence as indicated, respectively. (b, e) Peak differential reflection signal of WSe<sub>2</sub> monolayer and WSe<sub>2</sub>/nL-FePS<sub>3</sub> heterostructures as a function of the excitation fluence, respectively. (c, f) Two time constants deduced from biexponential fits of WSe<sub>2</sub> monolayer and WSe<sub>2</sub>/nL-FePS<sub>3</sub> heterostructures as a function of the excitation fluence, respectively.

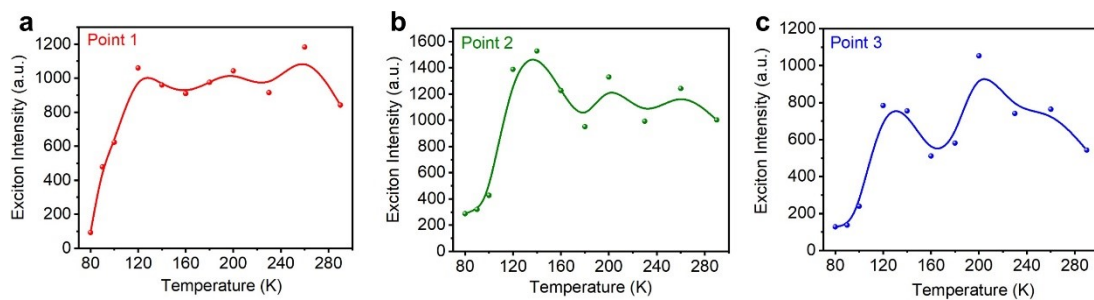

**Figure S6.** (a-c) The neutral exciton intensity of point 1, point 2, point 3 of WSe<sub>2</sub>/nL-FePS<sub>3</sub> heterostructure as a function of temperature under 532 nm excitation with the power density of 9.55 mJ/cm<sup>2</sup>, respectively.
